# Supplementary material for: A Novel Soy Isoflavone Derivative, 3′-Hydroxyglycitin, with Potent Antioxidant and Anti-α-Glucosidase Activity
Source: MDPI journal article supplement (doi:10.3390/plants11172202), 2022-08-25
Supplement: s1 [file s1]

## Supplemental Materials:

### Contents

**Figure S1.** The mass-mass analysis of 3'-hydroxyglycitin (**1**) at the positive mode. A significant signal at  $m/z$  463.3.

**Figure S2.** 1D NMR spectrum ( $^1\text{H}$ -NMR, 700 MHz,  $\text{DMSO-}d_6$ ) of 3'-hydroxyglycitin (**1**).

**Figure S3.** 1D NMR spectrum ( $^{13}\text{C}$ -NMR, 175 MHz,  $\text{DMSO-}d_6$ ) of 3'-hydroxyglycitin (**1**).

**Figure S4.** 1D NMR spectrum (DEPT-135, 175 MHz,  $\text{DMSO-}d_6$ ) of 3'-hydroxyglycitin (**1**).

**Figure S5.** 2D NMR spectrum ( $^1\text{H}$ - $^{13}\text{C}$  HSQC, 700 MHz,  $\text{DMSO-}d_6$ ) of 3'-hydroxyglycitin (**1**).

**Figure S6.** 2D NMR spectrum ( $^1\text{H}$ - $^{13}\text{C}$  HMBC, 700 MHz,  $\text{DMSO-}d_6$ ) of 3'-hydroxyglycitin (**1**).

**Figure S7.** 2D NMR spectrum ( $^1\text{H}$ - $^1\text{H}$  COSY, 700 MHz,  $\text{DMSO-}d_6$ ) of 3'-hydroxyglycitin (**1**).

**Figure S8.** 2D NMR spectrum ( $^1\text{H}$ - $^1\text{H}$  NOESY, 700 MHz,  $\text{DMSO-}d_6$ ) of 3'-hydroxyglycitin (**1**).

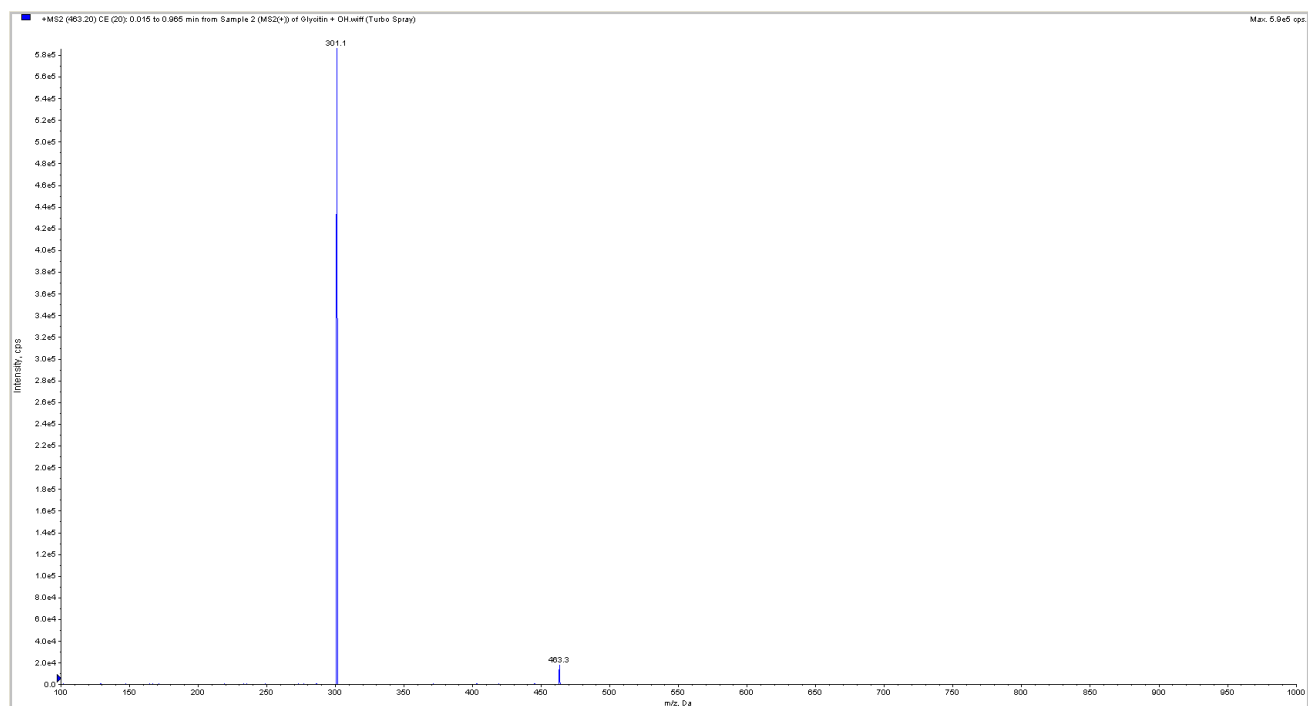

**Figure S1.** The mass-mass analysis of 3'-hydroxyglycitin (**1**) at the positive mode. A significant signal at  $m/z$  463.3.

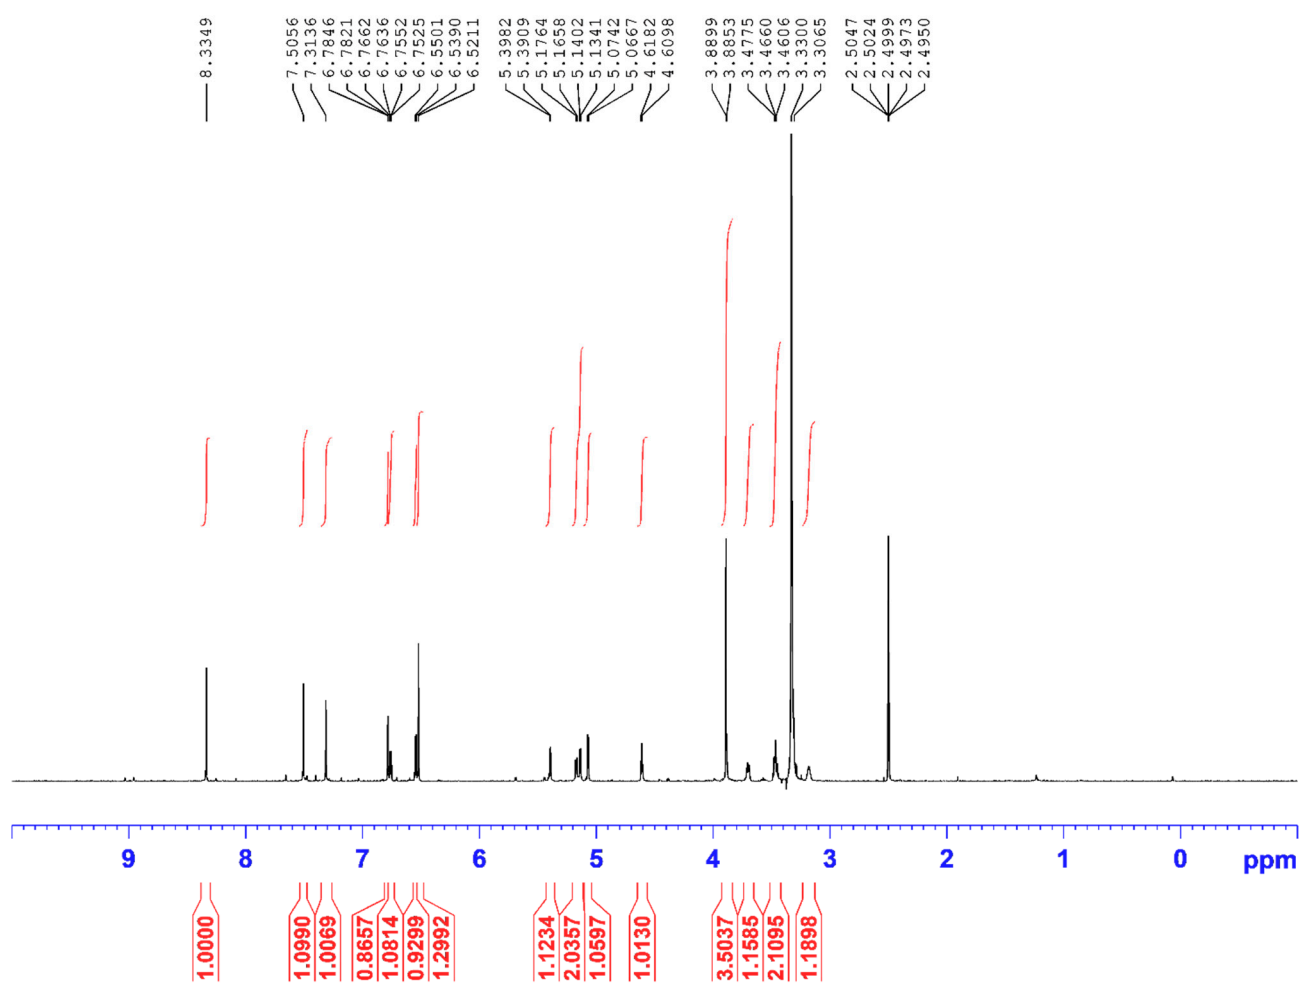

**Figure S2.** 1D NMR spectrum ( $^1\text{H}$ -NMR, 700 MHz,  $\text{DMSO-}d_6$ ) of 3'-hydroxyglycitin (**1**).

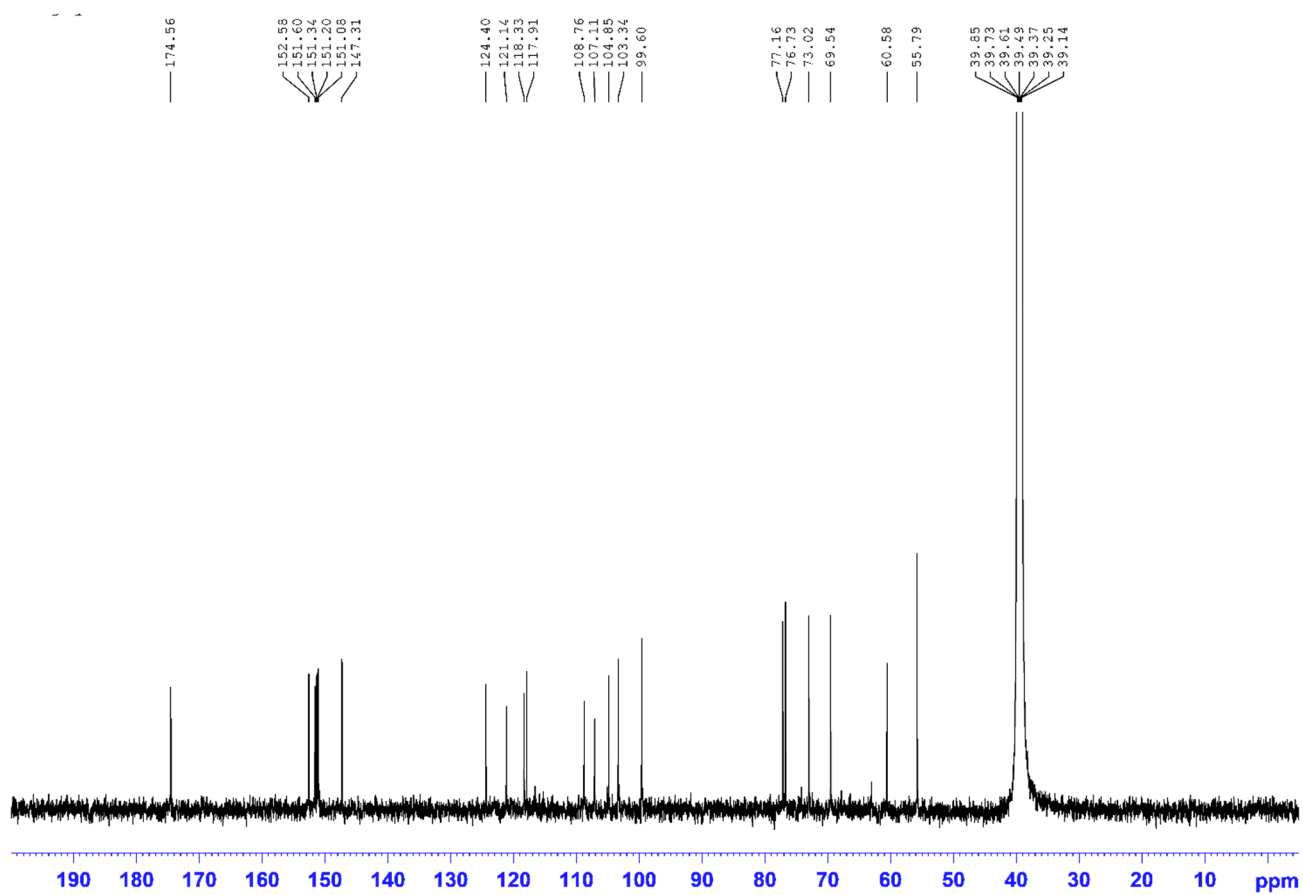

**Figure S3.** 1D NMR spectrum ( $^{13}\text{C}$ -NMR, 175 MHz, DMSO-  $d_6$ ) of 3'-hydroxyglycitin (**1**).

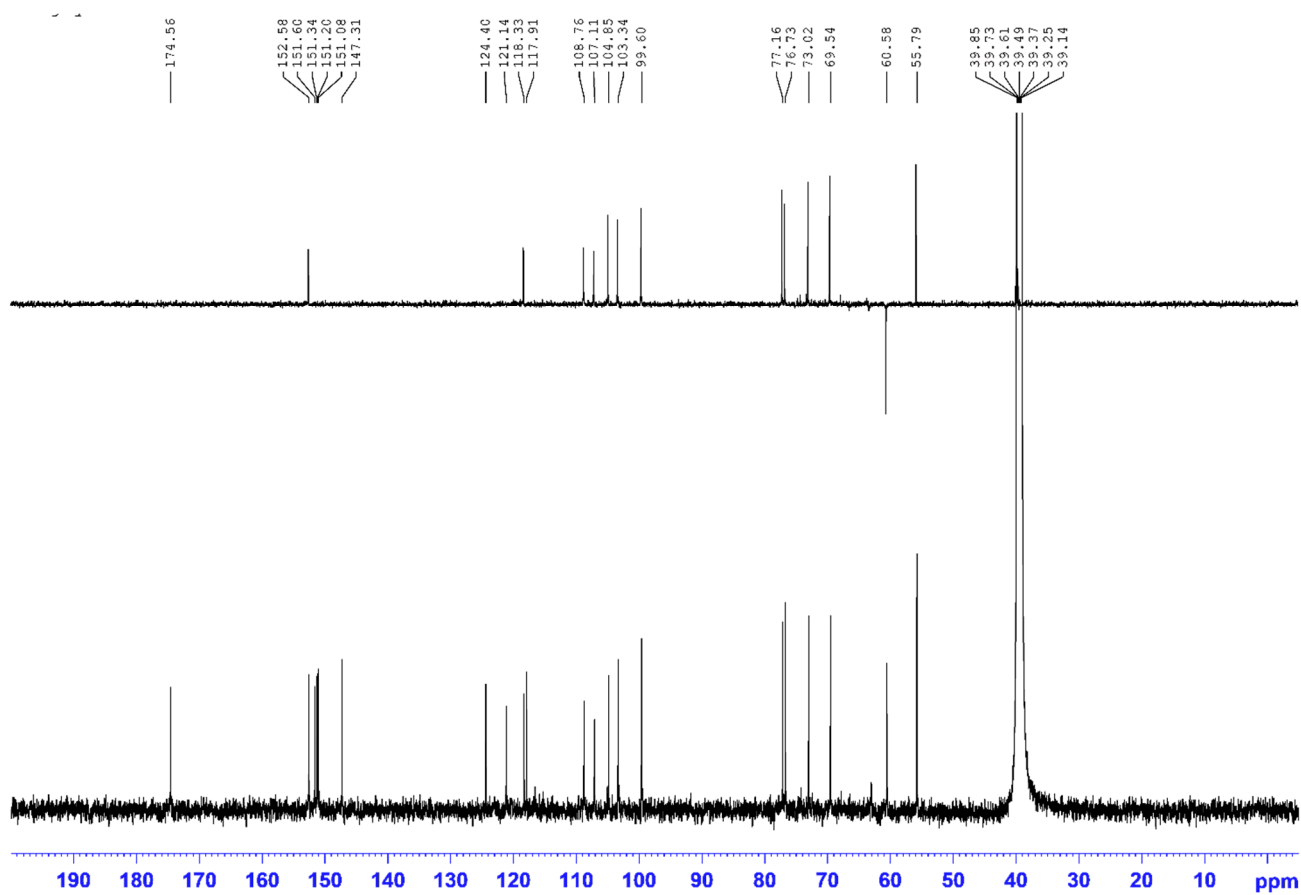

Figure S4. 1D NMR spectrum (DEPT-135, 175 MHz, DMSO- $d_6$ ) of 3'-hydroxyglycitin (1)

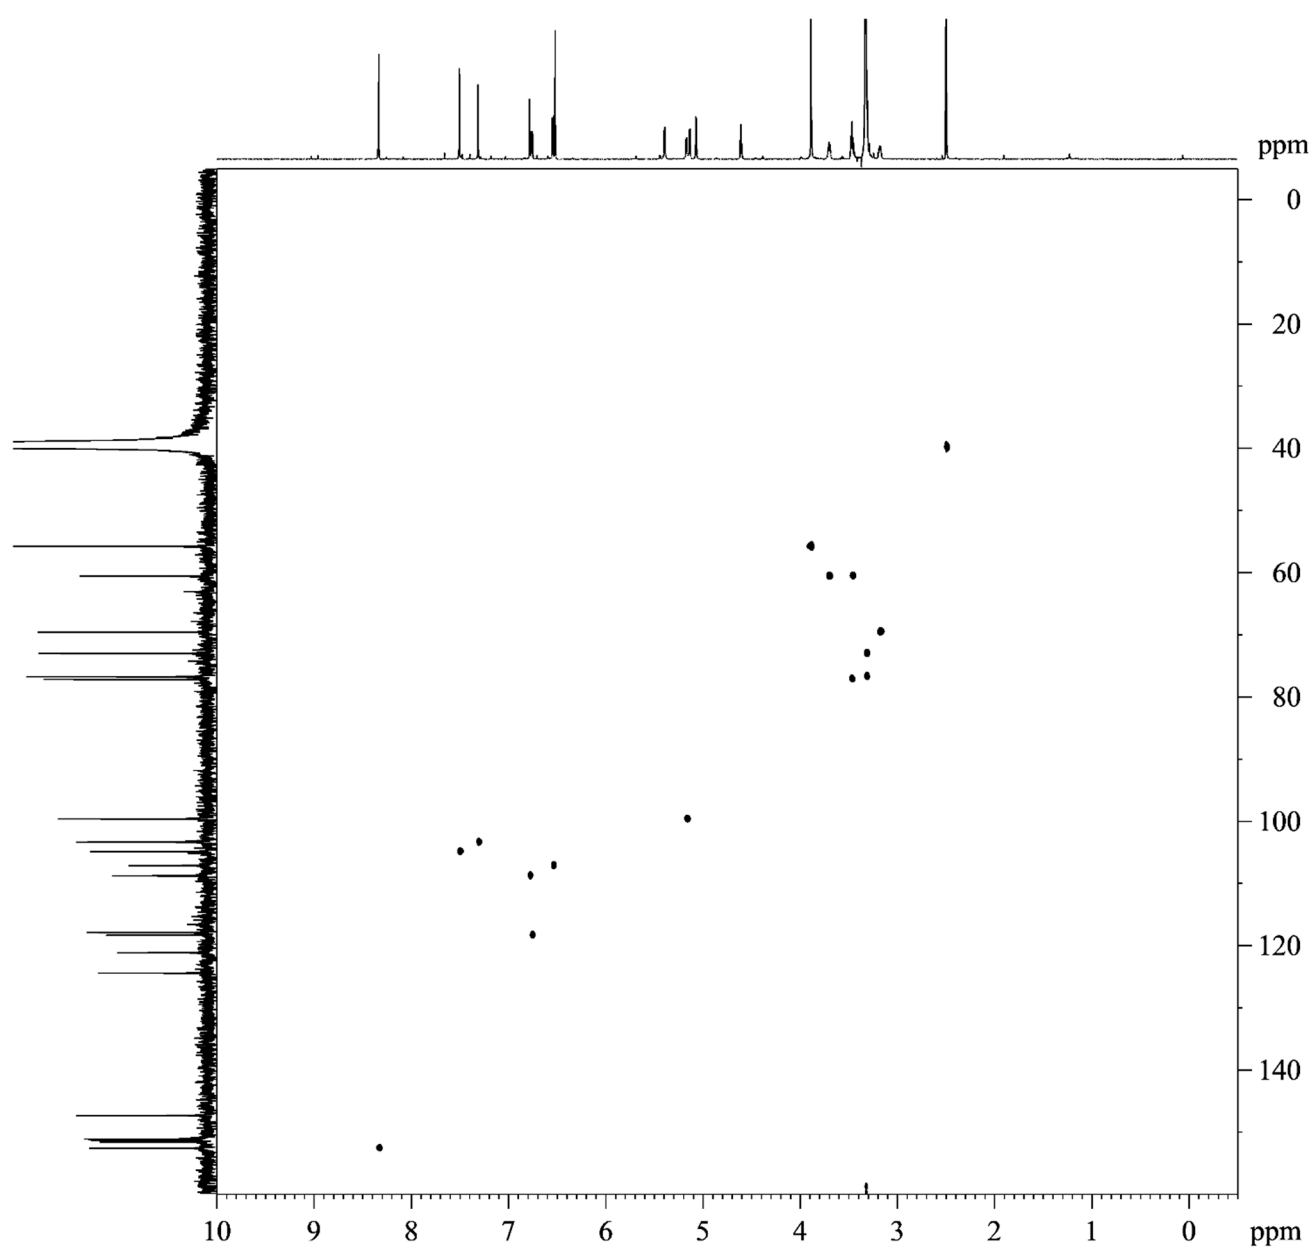

Figure S5. 2D NMR spectrum ( $^1\text{H}$ - $^{13}\text{C}$  HSQC, 700 MHz,  $\text{DMSO}-d_6$ ) of 3'-hydroxyglycitin (1)

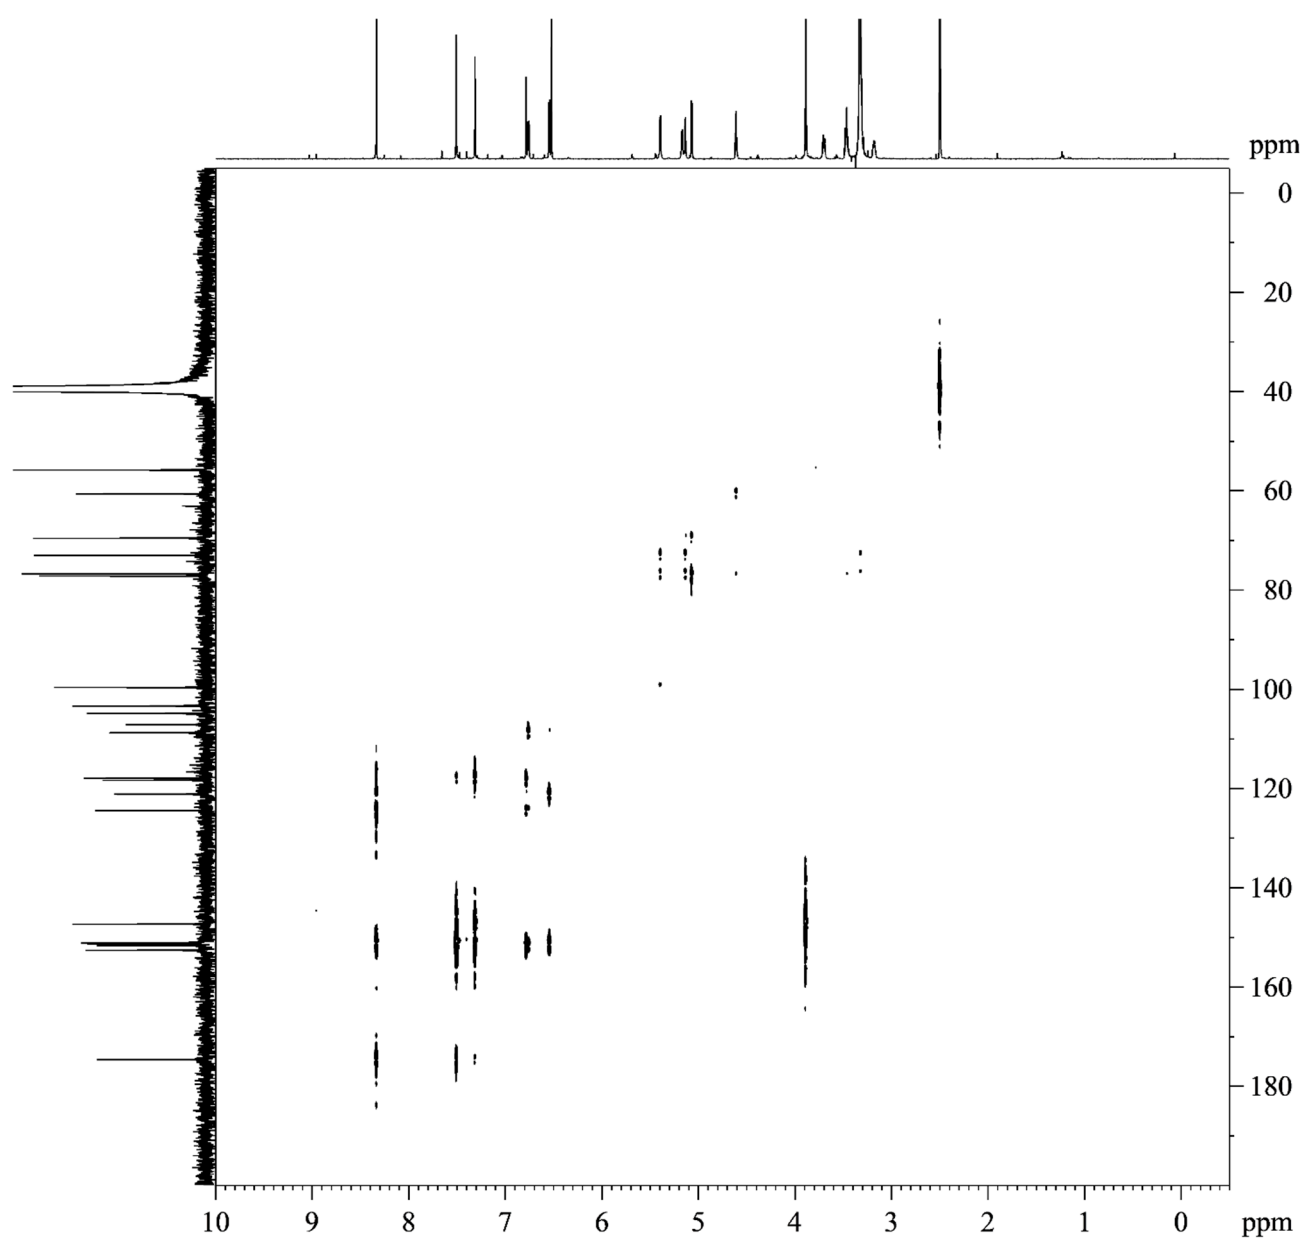

**Figure S6.** 2D NMR spectrum ( $^1\text{H}$ - $^{13}\text{C}$  HMBC, 700 MHz,  $\text{DMSO-}d_6$ ) of 3'-hydroxyglycitin (**1**)

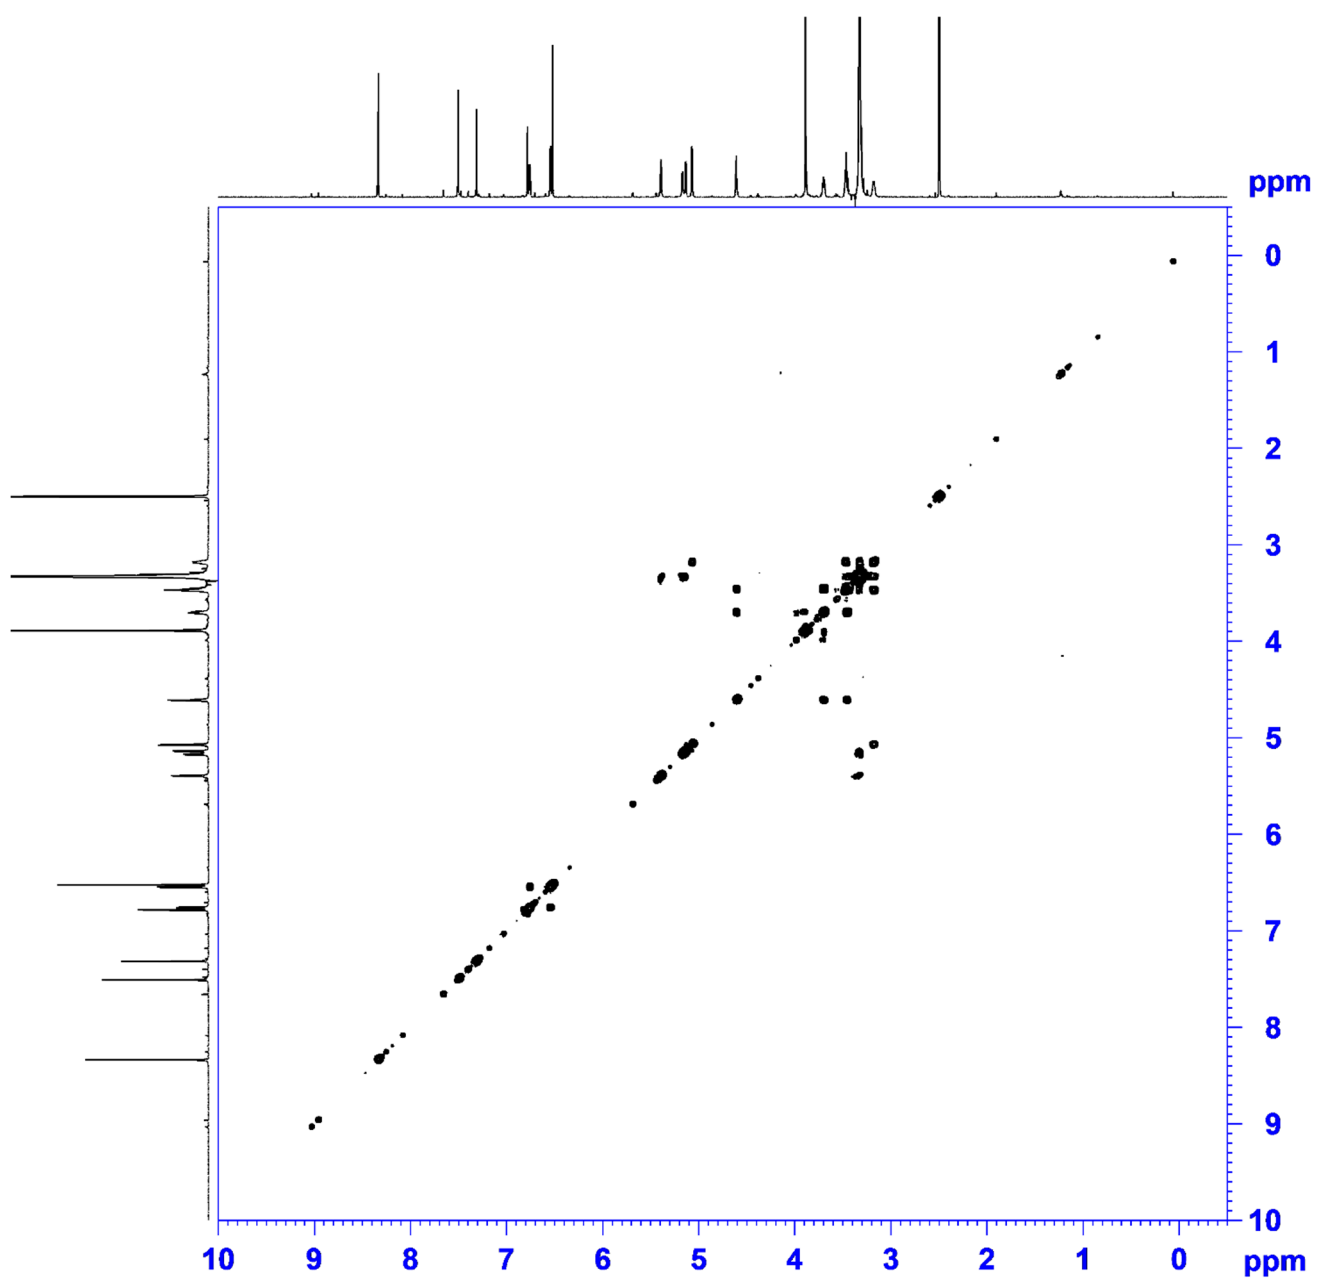

**Figure S7.** 2D NMR spectrum ( $^1\text{H}$ - $^1\text{H}$  COSY, 700 MHz,  $\text{DMSO}-d_6$ ) of 3'-hydroxylglycitin (**1**)



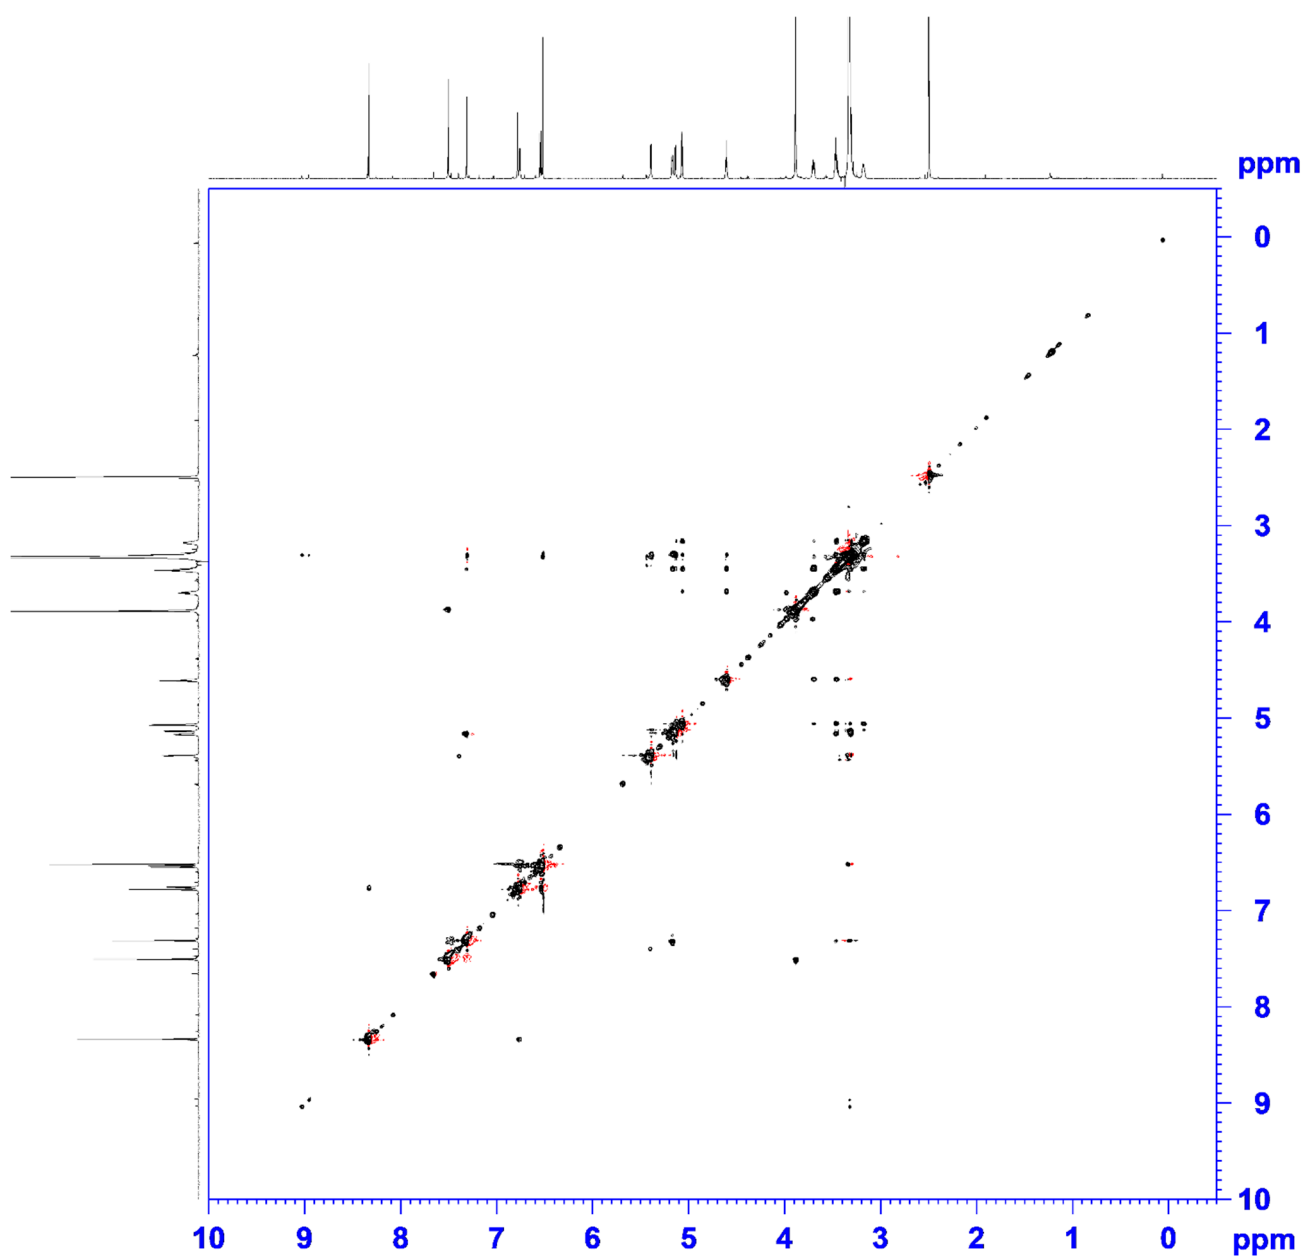

**Figure S8.** 2D NMR spectrum ( $^1\text{H}$ - $^1\text{H}$  NOESY, 700 MHz,  $\text{DMSO-}d_6$ ) of 3'-hydroxyglycitin (1)
